# Supplementary material for: Predicting human protein subcellular localization by heterogeneous and comprehensive approaches
Source: PubMed Central journal article supplement (PMC5489166; doi:10.1371/journal.pone.0178832), 2017-06-28
Supplement: pone.0178832.s002.pdf [file pone.0178832.s002.pdf]

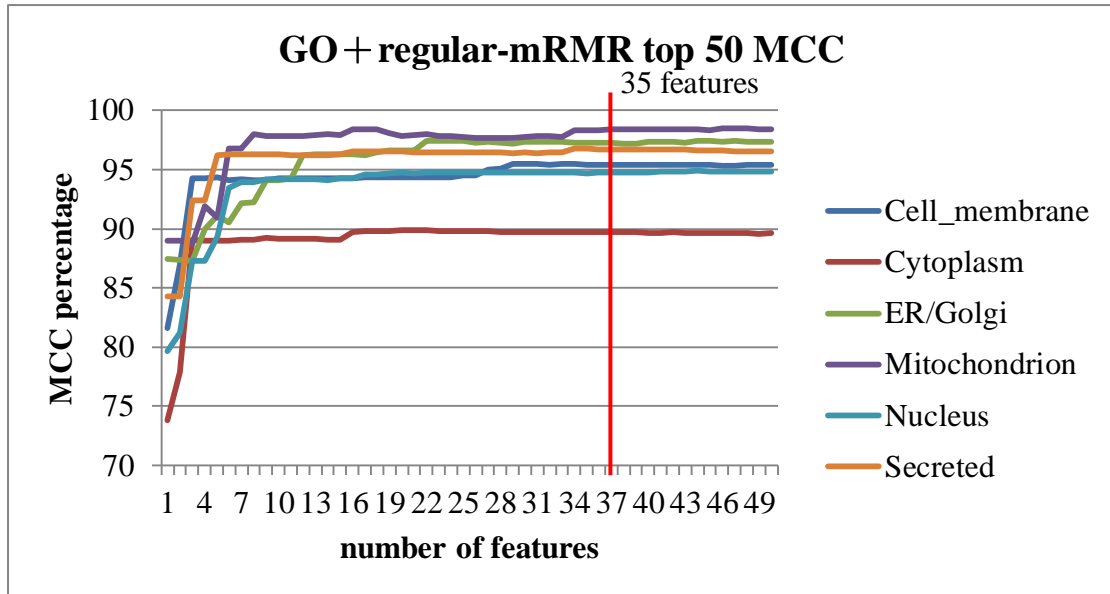

**Supplementary figure 2** The performance of REALoc with GO feature selection by regular-mRMR at six kinds of locations
