# Supplementary material for: Predicting human protein subcellular localization by heterogeneous and comprehensive approaches
Source: PubMed Central journal article supplement (PMC5489166; doi:10.1371/journal.pone.0178832), 2017-06-28
Supplement: pone.0178832.s005.pdf [file pone.0178832.s005.pdf]

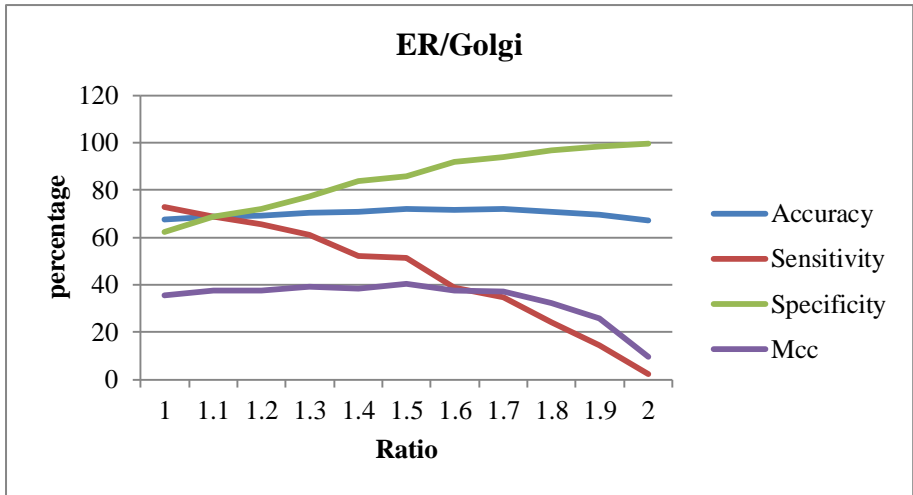

Supplementary figure 5 Negative and positive ratio test in ER/Golgi by SVMs
