# Supplementary material for: Predicting human protein subcellular localization by heterogeneous and comprehensive approaches
Source: PubMed Central journal article supplement (PMC5489166; doi:10.1371/journal.pone.0178832), 2017-06-28
Supplement: pone.0178832.s007.pdf [file pone.0178832.s007.pdf]

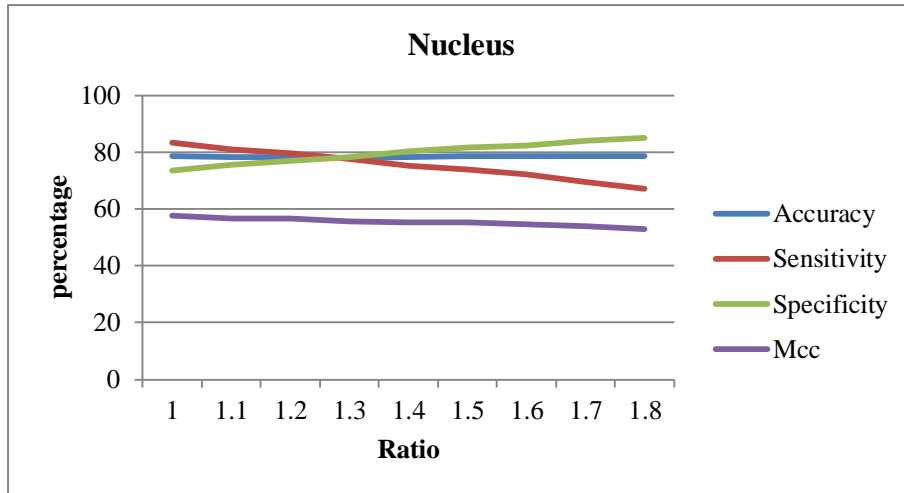

**Supplementary figure 7** Negative and positive ratio test in Nucleus by SVMs
