# Supplementary material for: Predicting human protein subcellular localization by heterogeneous and comprehensive approaches
Source: PubMed Central journal article supplement (PMC5489166; doi:10.1371/journal.pone.0178832), 2017-06-28
Supplement: pone.0178832.s010.pdf [file pone.0178832.s010.pdf]

**Supplementary table 1** List of amino acid indices were used in REALoc

---

| <b>Accession number</b> | <b>Data description</b>                             |
|-------------------------|-----------------------------------------------------|
| ANDN920101              | alpha-CH chemical shifts                            |
| ARGP820101              | Hydrophobicity index                                |
| BIGC670101              | Residue volume                                      |
| BROC820101              | Retention coefficient in TFA                        |
| BULH740101              | Transfer free energy to surface                     |
| BULH740102              | Apparent partial specific volume                    |
| BUNA790101              | alpha-NH chemical shifts                            |
| BUNA790102              | alpha-CH chemical shifts                            |
| BUNA790103              | Spin-spin coupling constants $3J_{H\alpha-NH}$      |
| BURA740101              | Normalized frequency of alpha-helix                 |
| BURA740102              | Normalized frequency of extended structure          |
| CHAM810101              | Steric parameter                                    |
| CHOP780201              | Normalized frequency of alpha-helix                 |
| DAWD720101              | Size                                                |
| DAYM780201              | Relative mutability                                 |
| FASG760101              | Molecular weight                                    |
| GEIM800104              | Alpha-helix indices for alpha/beta-proteins         |
| GEIM800105              | Beta-strand indices                                 |
| GEIM800107              | Beta-strand indices for alpha/beta-proteins         |
| GOLD730101              | Hydrophobicity factor                               |
| GOLD730102              | Residue volume                                      |
| GRAR740101              | Composition                                         |
| GRAR740102              | Polarity                                            |
| GUYH850101              | Partition energy                                    |
| HUTJ700101              | Heat capacity                                       |
| HUTJ700102              | Absolute entropy                                    |
| HUTJ700103              | Entropy of formation                                |
| ISOY800101              | Normalized relative frequency of alpha-helix        |
| ISOY800102              | Normalized relative frequency of extended structure |
| ISOY800103              | Normalized relative frequency of bend               |
| ISOY800104              | Normalized relative frequency of bend R             |
| ISOY800107              | Normalized relative frequency of double bend        |
| ISOY800108              | Normalized relative frequency of coil               |
| JANJ780102              | Percentage of buried residues                       |
| JANJ780103              | Percentage of exposed residues                      |
| JANJ790101              | Ratio of buried and accessible molar fractions (36) |

---

---

|                   |                                                           |
|-------------------|-----------------------------------------------------------|
| <b>JANJ790102</b> | Transfer free energy                                      |
| <b>JOND750101</b> | Hydrophobicity                                            |
| <b>JOND920101</b> | Relative frequency of occurrence                          |
| <b>JOND920102</b> | Relative mutability                                       |
| <b>JUKT750101</b> | Amino acid distribution                                   |
| <b>JUNJ780101</b> | Sequence frequency                                        |
| <b>KANM800101</b> | Average relative probability of helix                     |
| <b>KANM800102</b> | Average relative probability of beta-sheet                |
| <b>KANM800103</b> | Average relative probability of inner helix               |
| <b>KARP850101</b> | Flexibility parameter for no rigid neighbors              |
| <b>KARP850102</b> | Flexibility parameter for one rigid neighbor              |
| <b>KARP850103</b> | Flexibility parameter for two rigid neighbors             |
| <b>KHAG800101</b> | The Kerr-constant increments                              |
| <b>KLEP840101</b> | Net charge                                                |
| <b>KRIW710101</b> | Side chain interaction parameter                          |
| <b>KRIW790101</b> | Side chain interaction parameter                          |
| <b>KRIW790102</b> | Fraction of site occupied by water                        |
| <b>KRIW790103</b> | Side chain volume                                         |
| <b>KYTJ820101</b> | Hydropathy index                                          |
| <b>LEVM760101</b> | Hydrophobic parameter                                     |
| <b>LEVM760103</b> | Side chain angle theta(AAR)                               |
| <b>LEVM760105</b> | Radius of gyration of side chain                          |
| <b>LEVM760107</b> | van der Waals parameter epsilon                           |
| <b>LEWP710101</b> | Frequency of occurrence in beta-bends                     |
| <b>LIFS790102</b> | Conformational preference for parallel beta-strands       |
| <b>MAXF760101</b> | Normalized frequency of alpha-helix                       |
| <b>MAXF760102</b> | Normalized frequency of extended structure                |
| <b>MAXF760103</b> | Normalized frequency of zeta R                            |
| <b>MAXF760104</b> | Normalized frequency of left-handed alpha-helix           |
| <b>MAXF760105</b> | Normalized frequency of zeta L                            |
| <b>MEEJ810101</b> | Retention coefficient in NaClO <sub>4</sub>               |
| <b>MEEJ810102</b> | Retention coefficient in NaH <sub>2</sub> PO <sub>4</sub> |
| <b>MEIH800102</b> | Average reduced distance for side chain                   |
| <b>MEIH800103</b> | Average side chain orientation angle                      |
| <b>MIYS850101</b> | Effective partition energy                                |
| <b>NAGK730101</b> | Normalized frequency of alpha-helix                       |
| <b>NAGK730102</b> | Normalized frequency of beta-structure                    |
| <b>NAGK730103</b> | Normalized frequency of coil                              |

---

---

|                   |                                                    |
|-------------------|----------------------------------------------------|
| <b>NAKH900101</b> | AA composition of total proteins                   |
| <b>NAKH900102</b> | SD of AA composition of total proteins             |
| <b>NAKH900103</b> | AA composition of mt-proteins                      |
| <b>NAKH900108</b> | Normalized composition from fungi and plant        |
| <b>NAKH920101</b> | AA composition of CYT of single-spanning proteins  |
| <b>NAKH920103</b> | AA composition of EXT of single-spanning proteins  |
| <b>NAKH920105</b> | AA composition of MEM of single-spanning proteins  |
| <b>NAKH920108</b> | AA composition of MEM of multi-spanning proteins   |
| <b>OOBM770101</b> | Average non-bonded energy per atom                 |
| <b>OOBM850101</b> | Optimized beta-structure-coil equilibrium constant |
| <b>OOBM850102</b> | Optimized propensity to form reverse turn          |
| <b>OOBM850105</b> | Optimized side chain interaction parameter         |
| <b>PRAM900101</b> | Hydrophobicity                                     |
| <b>RACS770102</b> | Average reduced distance for side chain            |
| <b>RADA880108</b> | Mean polarity                                      |
| <b>TANS770101</b> | Normalized frequency of alpha-helix                |
| <b>TANS770103</b> | Normalized frequency of extended structure         |
| <b>TANS770108</b> | Normalized frequency of zeta R                     |
| <b>TANS770109</b> | Normalized frequency of coil                       |
| <b>VELV850101</b> | Electron-ion interaction potential                 |
| <b>ZIMJ680101</b> | Hydrophobicity                                     |
| <b>ZIMJ680103</b> | Polarity                                           |
| <b>ZIMJ680104</b> | Isoelectric point                                  |
| <b>WOLR790101</b> | Hydrophobicity index                               |
| <b>ENGD860101</b> | Hydrophobicity index                               |
| <b>FASG890101</b> | Hydrophobicity index                               |

---
