# Supplementary material for: Predicting human protein subcellular localization by heterogeneous and comprehensive approaches
Source: PubMed Central journal article supplement (PMC5489166; doi:10.1371/journal.pone.0178832), 2017-06-28
Supplement: pone.0178832.s011.pdf [file pone.0178832.s011.pdf]

**Supplementary table 2** The number of SVM models and the ratio of negative and positive data in the first layer

| <b>Subcellular location</b> | <b>Number of Models</b> | <b>Best P/N ratio*</b> |
|-----------------------------|-------------------------|------------------------|
| Cell membrane               | 3                       | 1 : 1.1                |
| Cytoplasm                   | 5                       | 1 : 1.0                |
| ER/Golgi                    | 7                       | 1 : 1.5                |
| Mitochondrion               | 9                       | 1 : 1.4                |
| Nucleus                     | 3                       | 1 : 1.0                |
| Extracellular               | 5                       | 1 : 1.5                |

\* P/N ratio: the ratio of positive data to negative data
