# Supplementary material for: Predicting human protein subcellular localization by heterogeneous and comprehensive approaches
Source: PubMed Central journal article supplement (PMC5489166; doi:10.1371/journal.pone.0178832), 2017-06-28
Supplement: pone.0178832.s012.pdf [file pone.0178832.s012.pdf]

### Supplementary algorithms 1

GO Regular-mRMR function- minimum Redundancy Maximum Relevance Feature Selection (mRMR) is a method for choosing features and simultaneously preventing features with similar characteristics appearing more than once. The features are placed in order of importance. However, this method produces different results depending on different order of original data. Therefore, Regular-mRMR can be used to solve this problem. The algorithm was as follows:

```
GO regular-mRMR fuction{
  for i= 1 to 5 times{
    re-sort GO_numbers;
    run mRMR;
    for j= 1 to 50 ranks{
      scoreGO_numbers = scoreGO_numbers + ( 50 - j + 1 ) ;
    }
  }
  scoreGO_numbers = scoreGO_numbers / 5 times;
  sort GO_numbers by scoreGO_numbers;
  return top 50 GO_numbers;
}
```
